# Supplementary material
Source: PubMed Central journal article supplement (PMC5380076)
Supplement: pnas.1620507114.sapp.pdf [file pnas.1620507114.sapp.pdf]

## Supplemental Figure Legends

### Supplemental Figure 1. Expression of LMOD1 in embryonic human intestine.

LMOD1 is expressed (brown stain) in smooth muscle cells that constitute layers of the intestine (A-C) and bladder (D-F), including muscularis mucosa, blood vessels, and both muscle layers of the muscularis propria. (G) Western blot showing LMOD1 expression in human aorta, bladder, and intestine, with undetectable expression in the kidney.

### Supplemental Figure 2. CRISPR-Cas9 targeting of CArG elements at *Lmod1*. (A)

Schematic of *Lmod1* proximal promoter (prom.) region containing two conserved CArG elements (vertical purple lines with indicated wild type sequences in black) showing position of gRNA (blue) immediately 5' of a PAM sequence (red) located within the more proximal CArG box. Guide-RNA (Supplemental Table 4), Cas9 mRNA, and single-stranded repair template (Supplemental Table 4) were injected into mouse fertilized eggs. The single-stranded oligonucleotide used in homology-directed repair contained the green substituted nucleotides within each CArG box; the PAM sequence was not mutated. (B) Alignment of Sanger sequencing confirmed CArG box (yellow) mutations in CArG-Mut mice. PAM sequence is highlighted in red. (C) RT-qPCR showing reduced *Lmod1* expression in aorta of CArG-Mut mice, but no difference in other tissues. Average *Lmod1* Ct value indicated above each bar. (D) Western blot showing no significant difference in LMOD1, MYH11, or TAGLN protein in CArG-WT or CArG-Mut bladder tissue. (E) Quantitation of LMOD1 protein in aorta and bladder of CArG-WT and CArG-Mut mice. No significant decrease in LMOD1 protein was observed in either tissue. Error bars here and in panel C are standard deviations around the mean.

### Supplemental Figure 3. Expression of SMC contractile proteins in *Lmod1* mutant mice. (A)

Western blot of LMOD1 protein (upper band, arrow) expression in aorta of indicated genotypes. The lower band here and elsewhere is non-specific as evidenced by its presence in the knockout aorta. (B) Western blot showing LMOD1 expression levels in bladder tissue from wild type (+/+), heterozygous (+/-), compound heterozygous (one allele carrying the 151 bp deletion of exon one and the other allele harboring mutations in both CArG elements at the *Lmod1* promoter; MUT/-), or homozygous (-/-) deletion of *Lmod1*.

### Supplemental Figure 4. Non-specific binding of LMOD1 antibody. (A)

Immunofluorescence microscopy showing LMOD1 and ACTA2 in sections of bladder tissue from wild type (WT) control or *Lmod1*<sup>-/-</sup> knockout (KO) mice, stained with either anti-LMOD1 antibody or normal IgG control. Note persistent weak signal with IgG control antibody and the thinning of the epithelial lining (ACTA2 negative stain) in bladder of KO. (B) Western blot of stomach and bladder tissue from control and *Lmod1*<sup>-/-</sup> mice depicting lower molecular weight bands that are not specific for LMOD1. Such nonspecific binding likely underscores the weak staining seen in *Lmod1* knockout mouse tissues such as bladder in panel A above as well as in Figures 3, 4, and 5 of main text.

**Supplemental Figure 5. Increased proliferation in outer SMC layer of intestine in *Lmod1* knockout.** (A) Images of Ki-67 stained (green stain, white arrows) sections of intestine from *Lmod1*<sup>-/-</sup> and control mice. White arrowheads indicate an increase in Ki-67 positive cells in the outer SMC layer of *Lmod1*<sup>-/-</sup> intestine. Sections were counterstained with MYH11 (red). Images taken with 40X objective. (B) Quantification of Ki-67+ cells in outer and inner SMC layers of the intestine. \* = p value < 0.05. n = 9 for +/+, n= 14 for -/-. (C) Immunofluorescence microscopy images showing no detectable differences in TUNEL staining between *Lmod1*<sup>-/-</sup> and wild type control mice. Positive control sample of intestine was subjected to DNase 1 treatment.

**Supplemental Figure 6. *Lmod1* knockout results in shortened intestinal length.** (A) Gross pathology of stomach and whole intestine from *Lmod1*<sup>+/-</sup> and *Lmod1*<sup>-/-</sup> mice. Note the distended stomach and shortened intestinal length in *Lmod1*<sup>-/-</sup> tissues. (B) Quantification of intestinal length from part A. *Lmod1* deletion results in significantly shorter intestinal length. (C) Quantification of colon diameter from H&E-stained sections from control and *Lmod1*<sup>-/-</sup> mice. Deletion of *Lmod1* did not result in the presence of a microcolon. Error bars are standard deviations around the means. All statistics calculated using unpaired Student T test, \*\* = p value < 0.01. (D) H&E-stained sections from control (a, c) and *Lmod1*<sup>-/-</sup> (b, d) mice of aorta (a, b) and esophagus (c, d) showing no overt histopathological changes with *Lmod1* deletion in these tissues.

**Supplemental Figure 7. Human versus mouse LMOD1.** CLUSTALW alignment of human versus mouse LMOD1 protein. Amino acid numbers for each species are shown at right. The colored and labeled boxed regions represent approximate locations of known functional domains in LMOD1. The mouse mutation introduced by two-component CRISPR editing is shown at top as a red boxed sequence labeled frameshift (fs) leading to a PTC (Stop sign; see also Figure 2C). The human point mutation is located further downstream and is indicated by a red box representing the SNP causing an Arginine (R) residue to become a PTC.

**Supplemental Figure 8. *Lmod1* deletion results in decreased filamentous actin pelleted by ultracentrifugation.** (A) In vivo G-actin:F-actin assay reveals that *Lmod1* deletion in primary mouse bladder tissue results in decreased levels of F-actin pelleted by ultracentrifugation (P). S and P refer to supernatant (G actin) and pellet (F-actin), respectively. (B) Quantification of *in vivo* G-actin:F-actin assay reveals that *Lmod1* deletion in primary mouse bladder tissue results in decreased levels of F-actin pelleted by ultracentrifugation. N = 7 for both knockout and control groups. Error bars represent the standard deviation around the mean. \*\* = p value < 0.01 using paired Student T test.

**Supplemental Figure 9. *Lmod1* deletion results in decreased filamentous actin staining.** Phalloidin staining (green) of duodenum and bladder from five control or five *Lmod1*<sup>-/-</sup> animals. Decreased phalloidin staining is consistently evident in *Lmod1*<sup>-/-</sup> bladder tissue.

**Supplemental Figure 10. Transmission electron microscopy of dense bodies in *Lmod1*<sup>-/-</sup> bladder.** Electron micrographs of dense bodies (black arrowheads) in smooth muscle of bladder (**a-c, e-g**) or intestine (**d, h**) tissue from *Lmod1*<sup>-/-</sup> (**a-d**) or *Lmod1*<sup>+/+</sup> (**e-h**) mice. Note abundance of glycogen granules (electron dense aggregates) in *Lmod1*<sup>+/+</sup> versus *Lmod1*<sup>-/-</sup>. Scale bars are all 1 μm except for panel **c** which is 0.5 μm.

**Supplemental Figure 11. Passive tension analysis of mouse jejunum ring segments and lack of compensation by other leiomodins proteins.** (**A**) Myography data showing real-time measurements of passive tension in mouse jejunum ring segments. Tissues were mounted in PSS buffer and equilibrated at 37°C for approximately 20 minutes prior to being dilated at regular intervals (black dotted lines), and the resulting passive tension was recorded approximately 1 minute later (time indicated by light blue lines on X axis). (**B**) RT-qPCR data showing no up-regulation of *Lmod2* or *Lmod3* in tissues following *Lmod1* deletion.

Week 14

Week 15

Week 22

Intestine

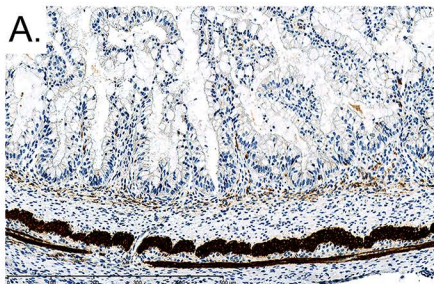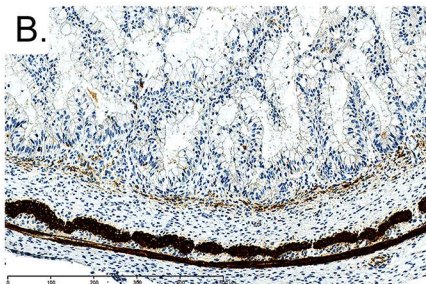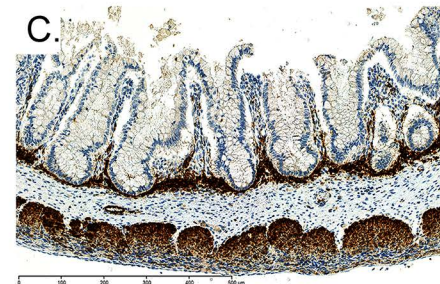

Bladder

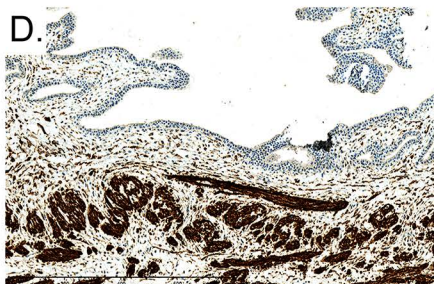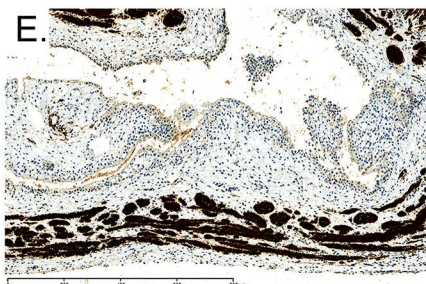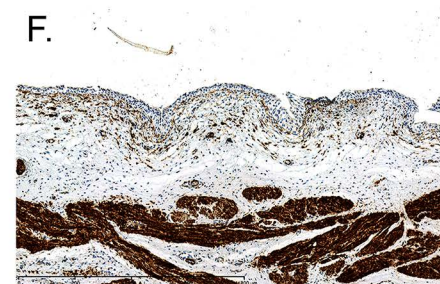

G.

Intestine      Kidney      Bladder      Aorta

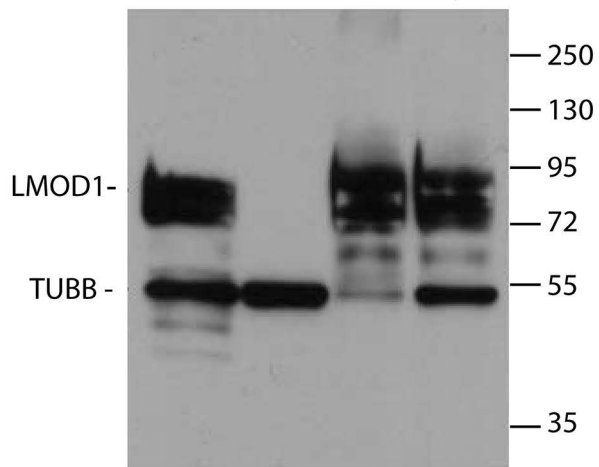

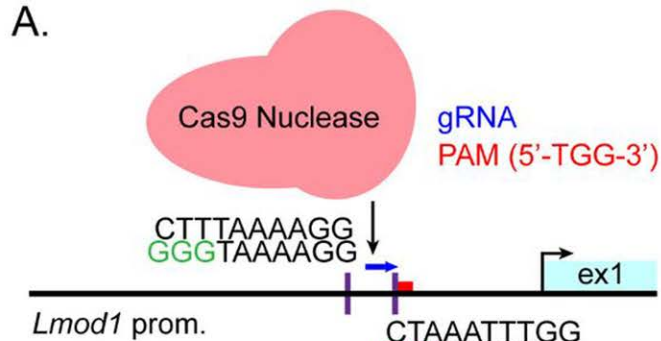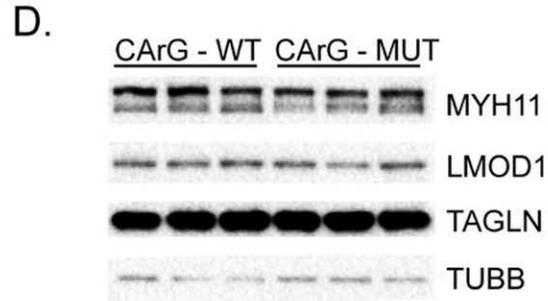

**B.**

CArG<sup>WT</sup> CCCCTTGTCTTTAAAAGGCTAAACTGCTCTGTACTAAATTGGTCACGCAGCGCTCCAA 120

CArG<sup>Mut</sup> CCCCTTGTGGGTAAAAGGCTAAACTGCTCTGTAGGGAATTGGTCACGCAGCGCTCCAA 149

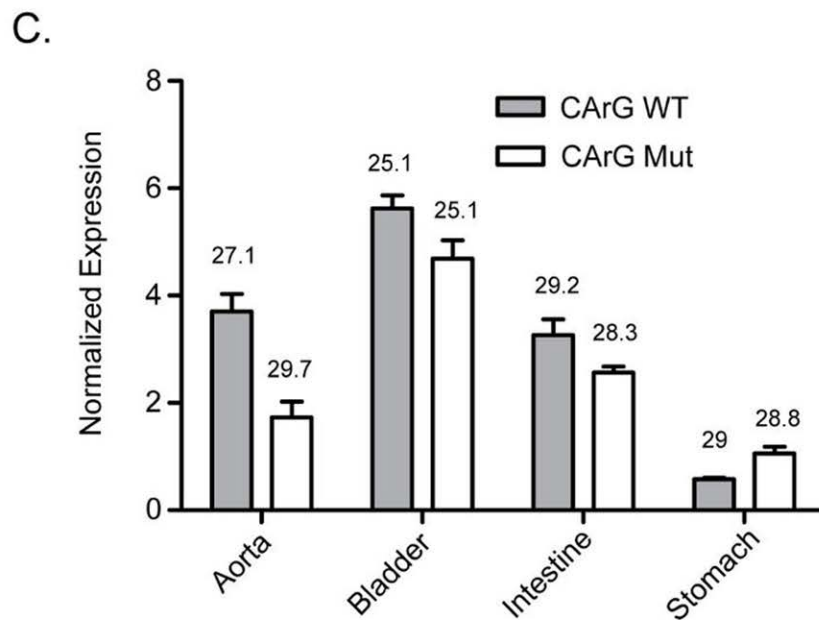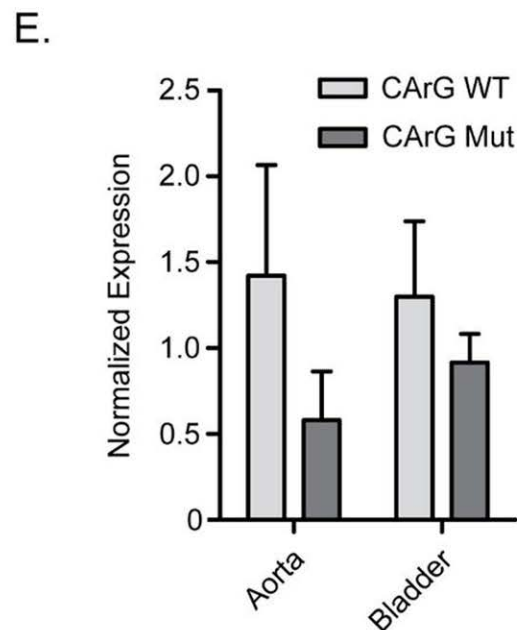

A.

Aorta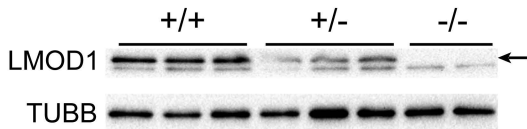

B.

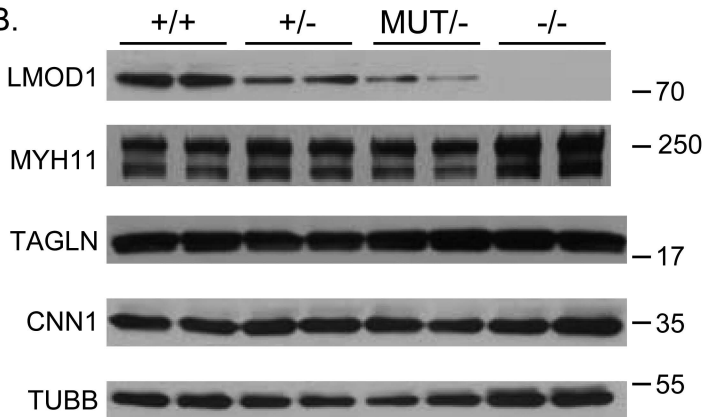

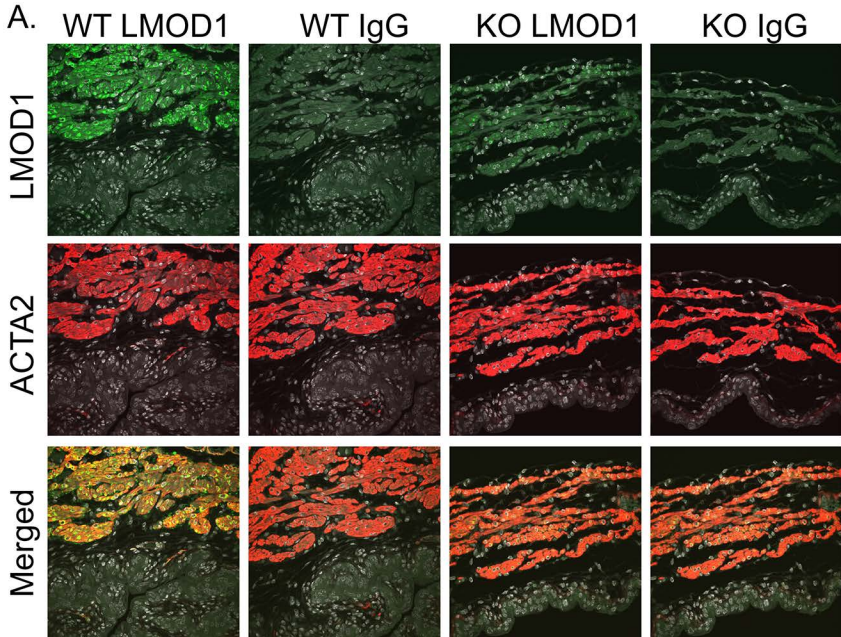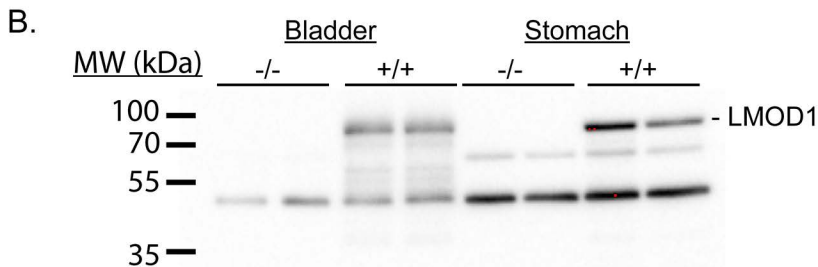

A.

*Lmod1*  $+/+$ 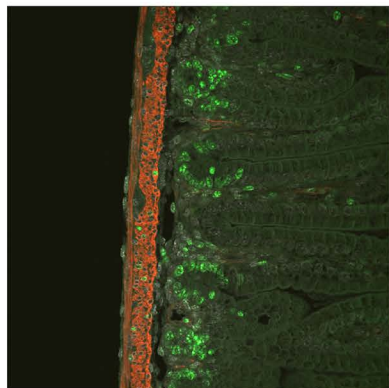*Lmod1*  $-/-$ 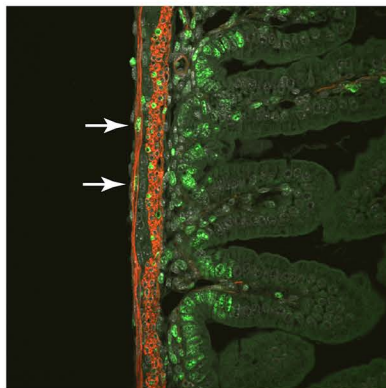

B.

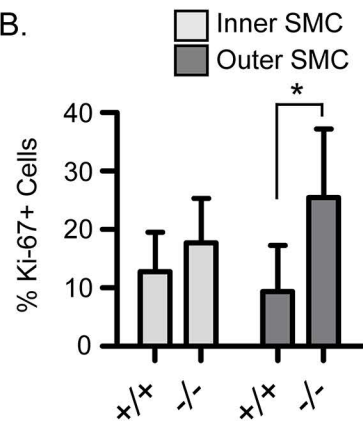

C.

Neg. Ctrl.

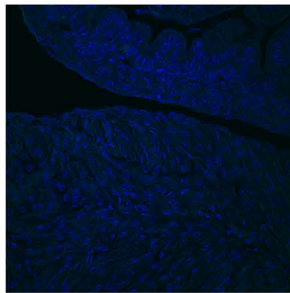

Pos. Ctrl.

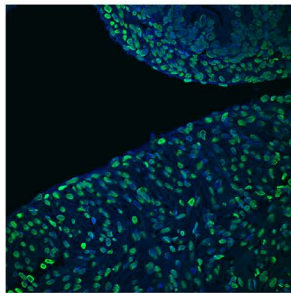*Lmod1*  $+/+$ 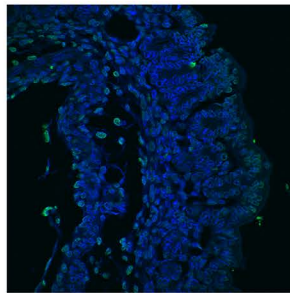*Lmod1*  $-/-$ 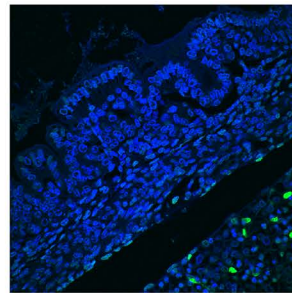



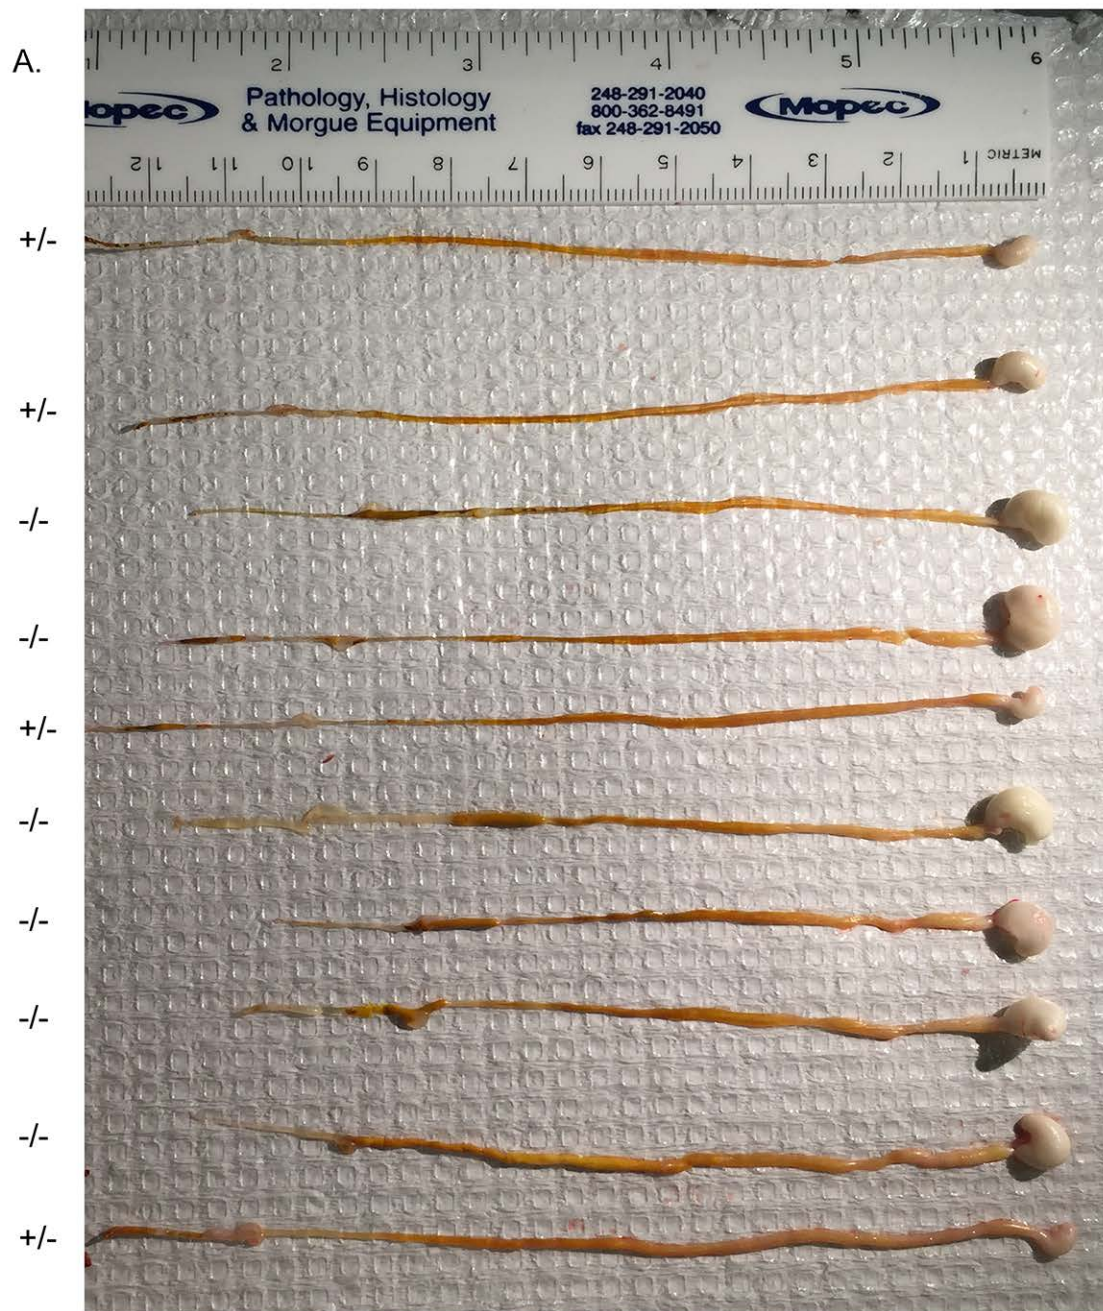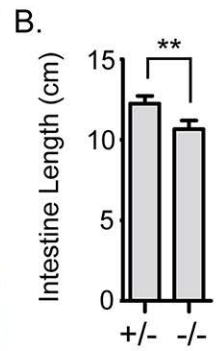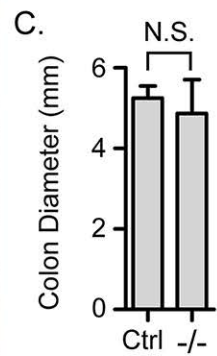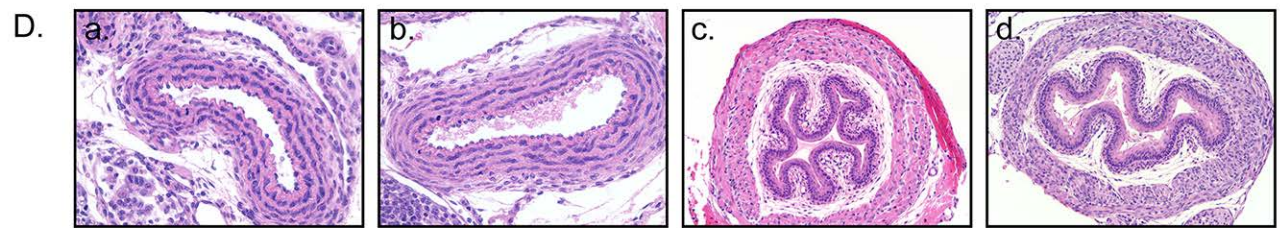



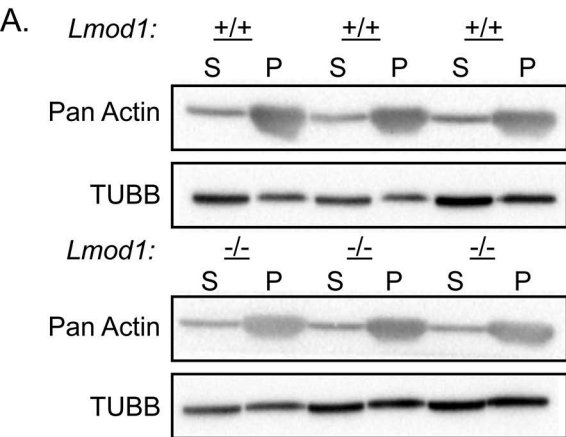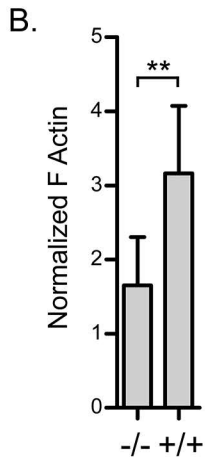

DuodenumBladderControl*Lmod1*<sup>-/-</sup>Control*Lmod1*<sup>-/-</sup>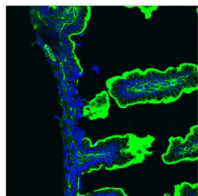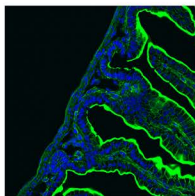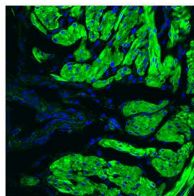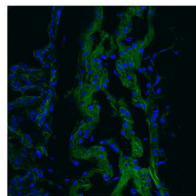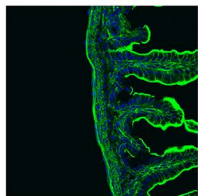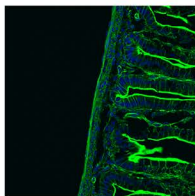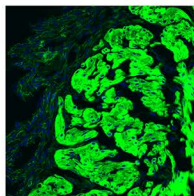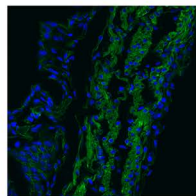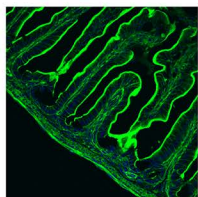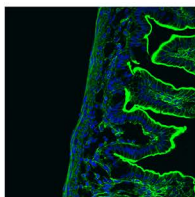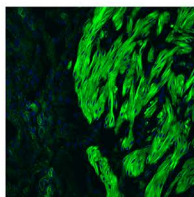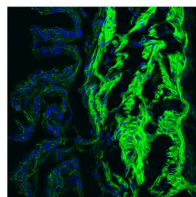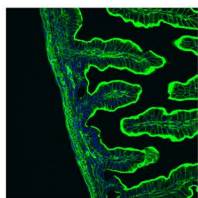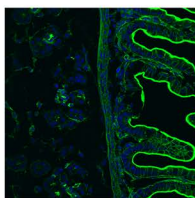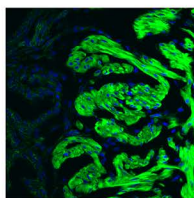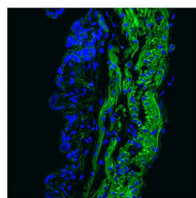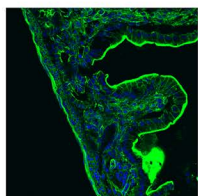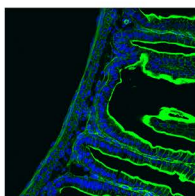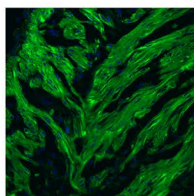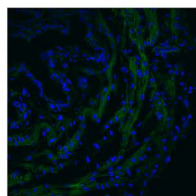

Mutant

WT

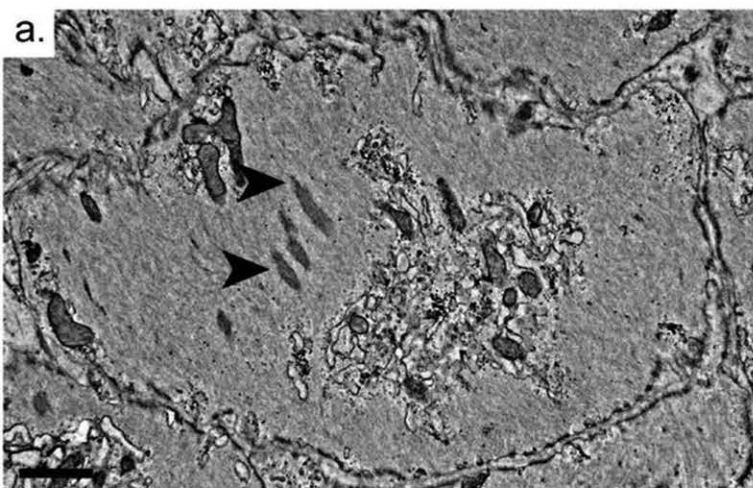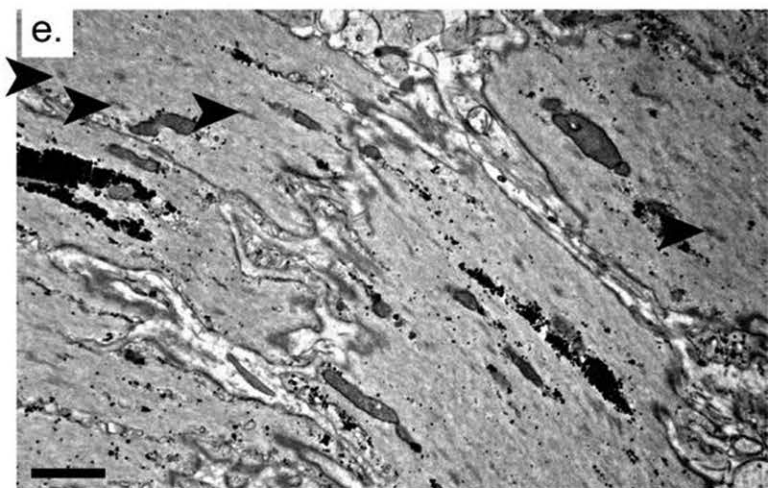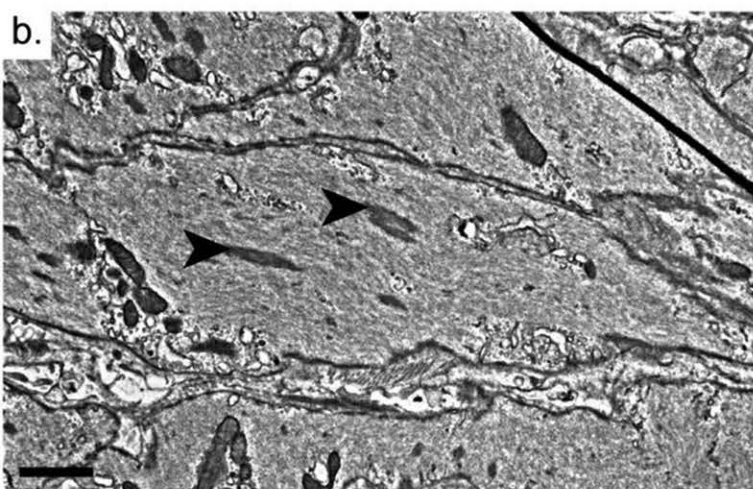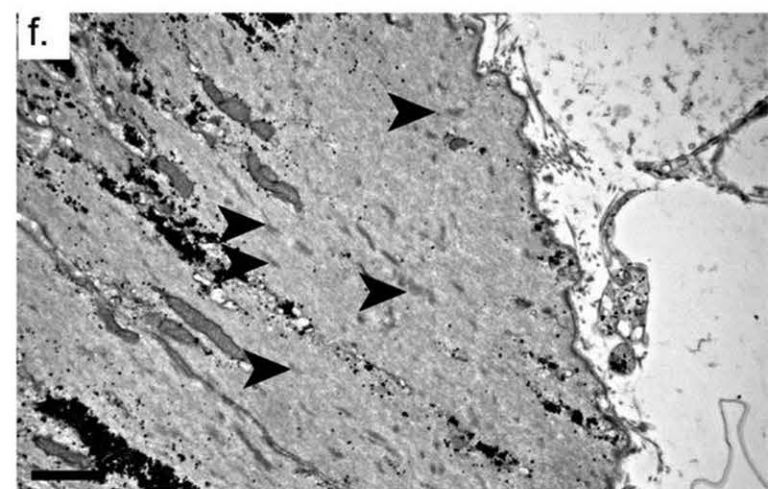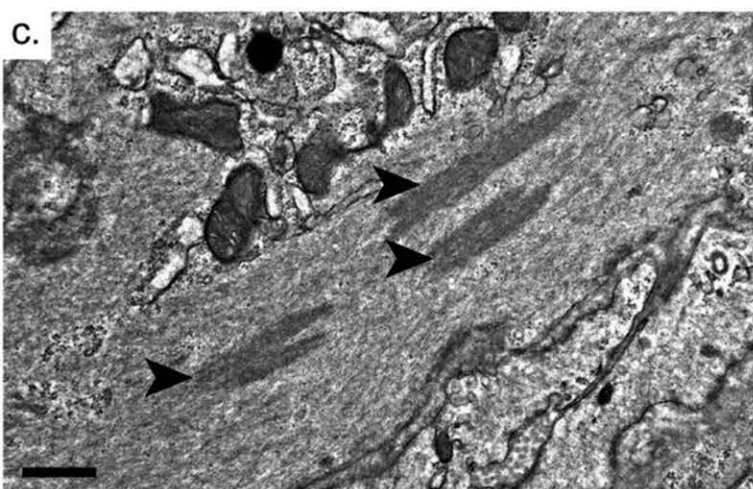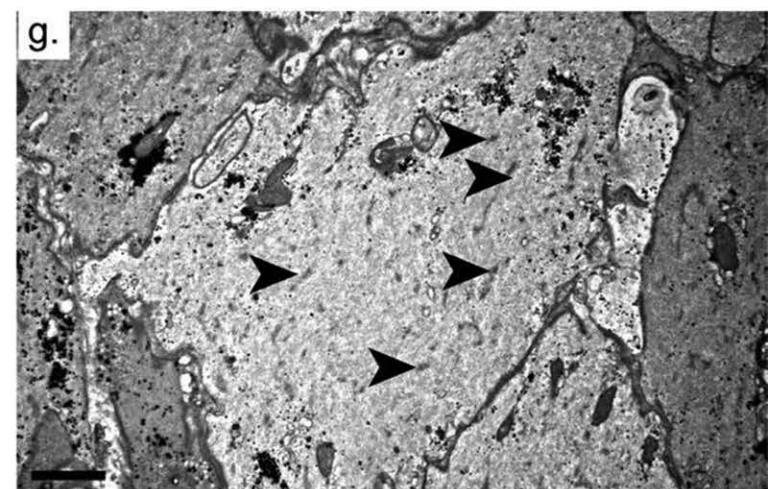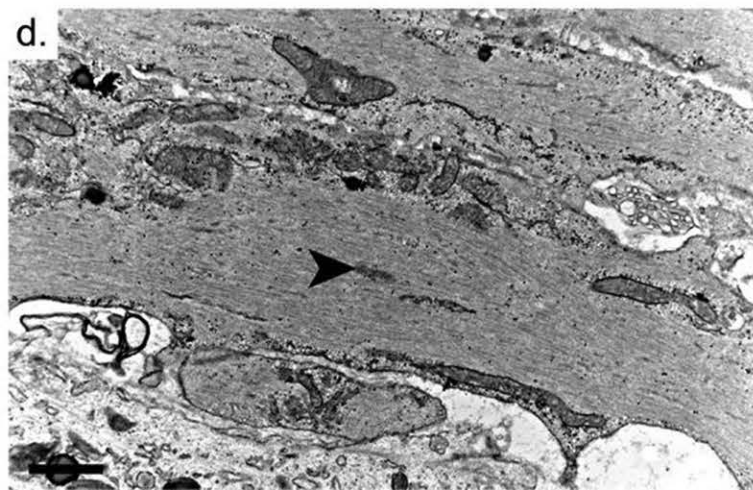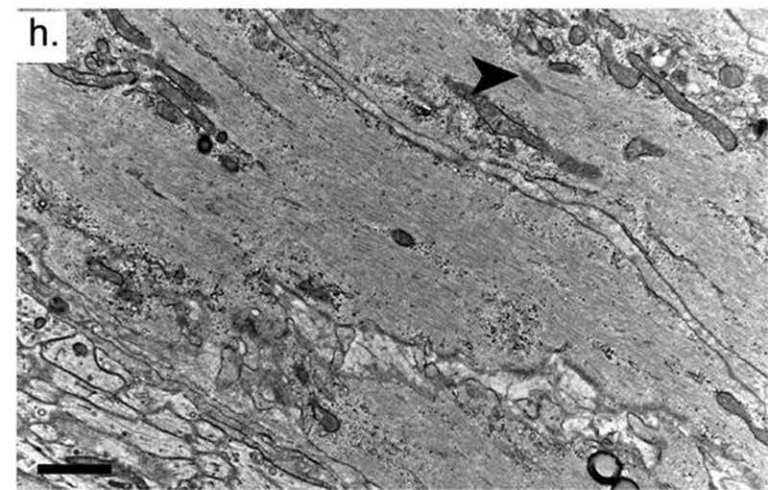

A.

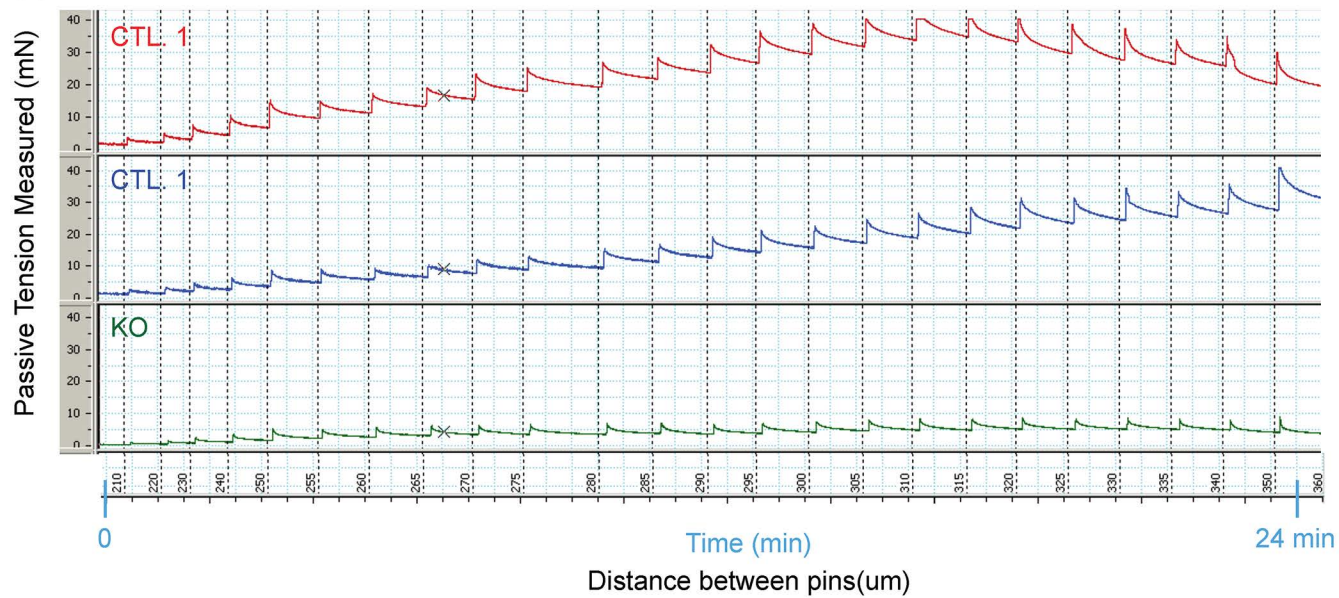

B.

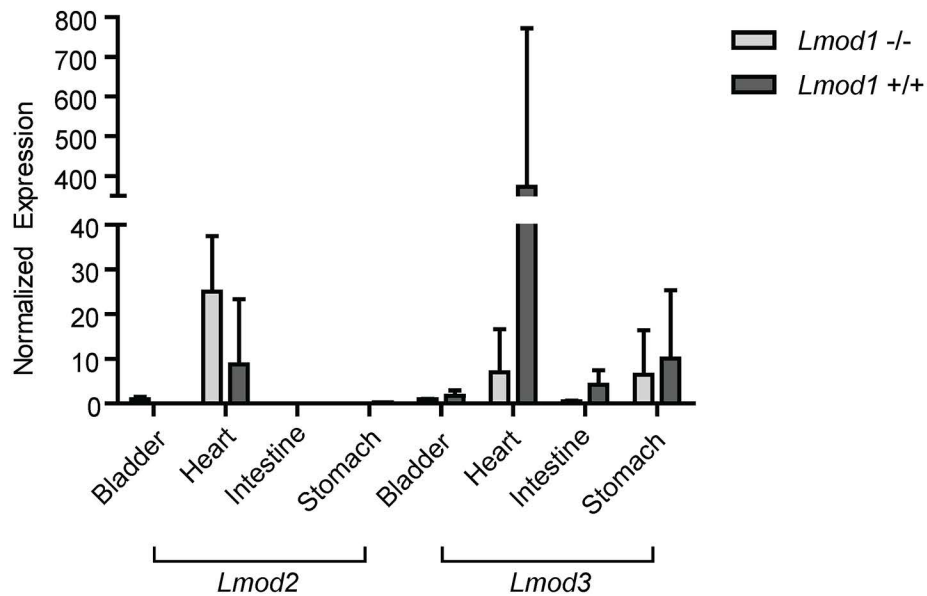

**Supplemental Table 1. Runs of homozygosity likely to be IBD**

| Region                       | Region Length | Cytoband Location | Genes | Recessive variants | Homozygous deleterious variants                  |
|------------------------------|---------------|-------------------|-------|--------------------|--------------------------------------------------|
| chr1:143,343,508-145,535,118 | 2191610       | q21.1             | 55    | 0                  |                                                  |
| chr1:173,370,927-174,796,005 | 1425078       | q25.1             | 30    | 0                  |                                                  |
| chr1:193,573,186-210,528,162 | 16954976      | q31.2 - q32.2     | 212   | 12                 | NM_012134.2:c.1108C>T<br>NM_001185156.1:c.541T>G |
| chr1:248,058,844-249,250,621 | 1191777       | q44               | 41    | 0                  |                                                  |
| chr1:39,434,967-40,549,847   | 1114880       | p34.3 - p34.2     | 28    | 0                  |                                                  |
| chr10:95,863,499-97,045,599  | 1182100       | q23.33 - q24.1    | 16    | 0                  |                                                  |
| chr12:33,710,632-35,800,000  | 2089368       | p11.1 - q11       | 1     | 0                  |                                                  |
| chr13:20,806,399-22,561,134  | 1754735       | q12.11            | 23    | 1                  |                                                  |
| chr13:96,306,895-97,414,036  | 1107141       | q32.1             | 7     | 0                  |                                                  |
| chr15:76,540,526-77,848,747  | 1308221       | q24.2 - q24.3     | 15    | 0                  |                                                  |
| chr16:46,450,037-48,939,622  | 2489585       | q11.2 - q12.1     | 25    | 0                  |                                                  |
| chr2:119,938,409-120,962,478 | 1024069       | q14.2             | 13    | 0                  |                                                  |
| chr2:87,375,359-90,240,473   | 2865114       | p11.2             | 31    | 0                  |                                                  |
| chr2:95,395,757-115,363,347  | 19967590      | q11.1 - q14.1     | 270   | 4                  | NM_153836.3:c.442-5G>A                           |
| chr3:16,785,031-18,119,015   | 1333984       | p24.3             | 6     | 0                  |                                                  |
| chr3:3,352,620-5,243,227     | 1890607       | p26.2 - p26.1     | 11    | 0                  |                                                  |
| chr4:8,660,540-9,914,140     | 1253600       | p16.1             | 34    | 0                  |                                                  |
| chr7:32,513,692-33,555,034   | 1041342       | p14.3             | 19    | 0                  |                                                  |
| chr8:0-4,852,787             | 4852787       | p23.3 - p23.2     | 32    | 1                  |                                                  |
| chr8:125,828,810-128,307,073 | 2478263       | q24.13 - q24.21   | 39    | 1                  |                                                  |
| chr8:4,941,482-8,122,303     | 3180821       | p23.2 - p23.1     | 60    | 0                  |                                                  |
| chr8:85,664,141-86,847,889   | 1183748       | q21.2             | 15    | 0                  |                                                  |

Included are Runs of homozygosity larger than 1 Mb, containing  $\geq 50$  consecutive probes. These regions are heterozygous in the parental samples and likely to be identical by descend. Most of the recessive variants ( $MAF \leq 1\%$ ) are predicted to be benign, except the variants depicted in the last column. Recessive variants are depicted in table 2

**Supplemental Table 2. Homozygous recessive variants in putative IBD regions**

| Chr. | Start     | Ref | Genotype | ExAC allele frequency | Gene            | Type | Location       | Effect        | Exon | HGVS cDNA-level              | HGVS protein-level | CADD PHRED |
|------|-----------|-----|----------|-----------------------|-----------------|------|----------------|---------------|------|------------------------------|--------------------|------------|
| 1    | 200974176 | G   | A A      |                       | <i>KIF21B</i>   | snp  | intronic       |               | 6    | NM_001252100.1:c.733-115C>T  |                    | 2.719      |
| 1    | 201038809 | G   | A A      |                       | <i>CACNA1S</i>  | snp  | intronic       |               | 18   | NM_000069.2:c.2361-80C>T     |                    | 3.588      |
| 1    | 201453417 | C   | T T      |                       | <i>CSRP1</i>    | snp  | UTR3           |               | 6    | NM_001193571.1:c.*424G>A     |                    | 6.002      |
| 1    | 201869033 | G   | A A      |                       | <i>LMOD1</i>    | snp  | exonic         | stopgain      | 2    | NM_012134.2:c.1108C>T        | p.Arg370*          | 35         |
| 1    | 202156089 | A   | T T      | 0.001243781           | <i>PTPRVP</i>   | snp  | ncRNA_intronic |               | 18   | NR_002930.2:c.3407-42A>T     |                    | 3.909      |
| 1    | 204192659 | G   | A A      | 0.008624843           | <i>PLEKHA6</i>  | snp  | exonic         | nonsynonymous | 22   | NM_014935.4:c.3086C>T        | p.Ala1029Val       | 13.13      |
| 1    | 204426534 | T   | C C      |                       | <i>PIK3C2B</i>  | snp  | intronic       |               | 10   | NM_002646.3:c.1713+322A>G    |                    | 9.315      |
| 1    | 207075619 | A   | C C      |                       | <i>IL24</i>     | snp  | intronic       |               | 6    | NM_001185156.1:c.540+202A>C  |                    | 0.266      |
| 1    | 207076321 | T   | G<br>G   | 0.003566428           | <i>IL24</i>     | snp  | exonic         | nonsynonymous | 7    | NM_001185156.1:c.541T>G      | p.Leu181Val        | 22.6       |
| 1    | 207078220 | T   | C C      |                       | <i>FAIM3</i>    | snp  | UTR3           |               | 8    | NM_005449.4:c.*144A>G        |                    | 9.955      |
| 1    | 207086885 | G   | A A      |                       | <i>FAIM3</i>    | snp  | intronic       |               | 2    | NM_005449.4:c.373+219C>T     |                    | 4.494      |
| 1    | 207133613 | A   | G<br>G   |                       | <i>FCAMR</i>    | snp  | intronic       |               | 6    | NM_001170631.1:c.1454+154T>C |                    | 3.249      |
| 2    | 96940649  | T   | C C      |                       | <i>SNRNP200</i> | snp  | UTR3           |               | 45   | NM_014014.4:c.*101A>G        |                    | 4.171      |
| 2    | 102000169 | C   | T T      |                       | <i>CREG2</i>    | snp  | intronic       |               | 2    | NM_153836.3:c.442-5G>A       |                    | 8.603      |
| 2    | 102636342 | G   | A A      |                       | <i>IL1R2</i>    | snp  | intronic       |               | 5    | NM_004633.3:c.688+68G>A      |                    | 5.461      |
| 2    | 105897274 | A   | T T      |                       | <i>TGFBRAP1</i> | snp  | intronic       |               | 6    | NM_004257.5:c.1122-94T>A     |                    | 3.669      |
| 8    | 1719112   | C   | T T      |                       | <i>CLN8</i>     | snp  | UTR5           |               | 2    | NM_018941.3:c.-109C>T        |                    | 8.105      |
| 8    | 126059429 | T   | C C      | 0.0000165             | <i>KIAA0196</i> | snp  | intronic       |               | 20   | NM_014846.3:c.2504+20A>G     |                    | 0.989      |
| 13   | 21296049  | G   | A A      | 0.001284481           | <i>IL17D</i>    | snp  | exonic         | nonsynonymous | 3    | NM_138284.1:c.565G>A         | p.Ala189Thr        | 8.397      |

All Homozygous recessive variants with an MAF below 1% in putative IBD regions.



**Supplemental Table 3.** Off target sites of gRNAs and CRISPResso result

| gRNA | Chromosome Coordinate | Primer  | Primer Sequence         | Mismatch positions Sequence           | Location   | Nearest Gene   | Percent indels from CRISPResso |
|------|-----------------------|---------|-------------------------|---------------------------------------|------------|----------------|--------------------------------|
| 1    | chr2:-168304560       | Forward | TTTCTTCTTCCAACAGCGTTTC  | 2:4:8:19<br>CTACAGTGGCTAAGTACCCGTGG   | 3'utr      | <i>Nfatc2</i>  | 0.4%                           |
|      |                       | Reverse | GGTCCTGACCACAAAGTCATA   |                                       |            |                |                                |
| 1    | chr2:+119860458       | Forward | CAAACCTGCCCAGTCTACAT    | 1:4:10:19<br>TCAGAGTAGTTAAGTACCAGTGG  | intron     | <i>Pla2g4b</i> | ND                             |
|      |                       | Reverse | CTTCCTTCTCCCAGACACTTC   |                                       |            |                |                                |
| 1    | chr2:+155459613       | Forward | TGGTGACAGGAAGAGTGGA     | 5:6:8:20<br>CCAACCTGGCTAAGTACCGCAAG   | exon       | <i>Myh7b</i>   | 0.3%                           |
|      |                       | Reverse | CACTCCTTGTGCTAAGAGATGAA |                                       |            |                |                                |
| 1    | chr3:+81759039        | Forward | CTTCTTGCCTTCTTCCCTCTG   | 9:12:20<br>CCAAAGTAACTCAGTACCGTTGG    | 3'utr      | <i>Ctso</i>    | 0.0%                           |
|      |                       | Reverse | CCGTTTCTTTACCCTCCATGAT  |                                       |            |                |                                |
| 1    | chr11:-69611753       | Forward | GGTTCTCTAAGGGTGAGTGTAAG | 4:8:11:13<br>CCACAGTGGCCATGTACCGGGAG  | exon       | <i>Fgf11</i>   | 0.6%                           |
|      |                       | Reverse | GCTCAGGGCATGTGTGT       |                                       |            |                |                                |
| 1    | chr7:+36220567        | Forward | TGGTCCTTCTGTCTCCTTAGAT  | 1:7:12:19<br>GCAAAGCAGCTCAGTACCAGAAG  | exon       | <i>Cep89</i>   | ND                             |
|      |                       | Reverse | GCTCCCGCACTTACCTTT      |                                       |            |                |                                |
| 1    | chr5:+44105813        | Forward | TACTGGCTATGCACCAAAGG    | 4:11:19:20<br>CCACAGTAGCCAAGTACCTTCAG | exon       | <i>Cc2d2a</i>  | 1.0%                           |
|      |                       | Reverse | CCATCTTACAATCGTGGCTCT   |                                       |            |                |                                |
| 1    | chr10:-94052876       | Forward | CCAGGCAATTAGGTCTGGATT   | 9:14:17:18<br>CCAAAGTAACTAATTATTGGGAG | 3'utr      | <i>Tmc33</i>   | 0.5%                           |
|      |                       | Reverse | CTTGTGTTGTCTGTTGGTGTTTC |                                       |            |                |                                |
| 1    | chr6:+32136129        | Forward | GGGAAGCAAGCCAGTAAAGA    | 1:10:19<br>GCAAAGTAGTTAAGTACCTGCAG    | intron     | <i>Plxna4</i>  | 0.0%                           |
|      |                       | Reverse | CTGCATCACCATCAGGAAAGA   |                                       |            |                |                                |
| 1    | chr9:+40970879        | Forward | ATAGAACGTGGTGTGGAAGTG   | 1:06:13<br>TCAAAATAGCTAGGTACCGGAGG    | intergenic | <i>Ubash3b</i> | ND                             |
|      |                       | Reverse | ACTTCCACACTAACTGGGTGT   |                                       |            |                |                                |

|   |                 |         |                        |                                      |        |                  |      |
|---|-----------------|---------|------------------------|--------------------------------------|--------|------------------|------|
| 2 | chr15:+60655990 | Forward | GGGAGGGAAGGAAATAGAACT  | 3:06:07<br>GGACTAGACTCACCTGCCGCAAG   | intron | <i>Fam84b</i>    | 1.0% |
|   |                 | Reverse | GCGAACTCGCCCTAGAAG     |                                      |        |                  |      |
| 2 | chr12:+85262753 | Forward | TACCTTCCCAGCTCCAAC     | 1:3:5:6<br>CGCCCCGACTCACCTGCCGCTGG   | intron | <i>Numb</i>      | ND   |
|   |                 | Reverse | GGACAGGAAGAGTCAACCAATC |                                      |        |                  |      |
| 2 | chr6:+85290322  | Forward | CCAAATAGAGGAGACCCTTACC | 4:5:6:8<br>GGTGGACGCTCACCTGCCGCTGG   | intron | <i>Rab11fip5</i> | 0.2% |
|   |                 | Reverse | GGCCCTTGACCTCTTCTTC    |                                      |        |                  |      |
| 2 | chr8:-123093143 | Forward | AGGAGGACAGATAGACAGACTT | 8:09:12<br>GGTCTTCCTTCTCCTGCCGCAGG   | exon   | <i>Gse1</i>      | 0.5% |
|   |                 | Reverse | GTGCCCAGCCTCATCTC      |                                      |        |                  |      |
| 2 | chr1:-174475299 | Forward | GCTCTTCCAGCTTCTGTTTCT  | 4:5:10:20<br>GGTTCTCACGCACCTGCCGTCGG | exon   | <i>Cfap45</i>    | 0.0% |
|   |                 | Reverse | TGTGGACCTTGAAGCATGAC   |                                      |        |                  |      |
| 2 | chr11:+54864689 | Forward | CTTTCTGACTCCCAAGGAAAGA | 5:9:10:12<br>GGTCCTCAACCTCCTGCCGCAGG | exon   | <i>Ccdc69</i>    | ND   |
|   |                 | Reverse | ACTGTGCCAAGAGTGAGTG    |                                      |        |                  |      |
| 2 | chr5:-121812464 | Forward | CCTACCTCACCTTGTTCTTGTT | 2:7:10:19<br>GCTCTTTACACACCTGCCACAGG | exon   | <i>Gm15800</i>   | 0.7% |
|   |                 | Reverse | AGCTAGGGTCAGCATCTCA    |                                      |        |                  |      |
| 2 | chr19:-46384378 | Forward | CAGGCATGTGCAATATTTGGG  | 6:10:18<br>GGTCTGCACCCACCTGCAGCAGG   | exon   | <i>Nfkb2</i>     | 0.9% |
|   |                 | Reverse | GCAGATAGCCCACGTCATTTA  |                                      |        |                  |      |
| 2 | chr15:-83161031 | Forward | AGAGAGGGAGAGAGAGAGAGA  | 1:3:8:18<br>TGGCTTCTCTCACCTGCTGCAGG  | exon   | <i>Arfgap3</i>   | ND   |
|   |                 | Reverse | CAGGAGACCACAGGACATTG   |                                      |        |                  |      |
| 2 | chr2:-167433844 | Forward | GGTGAGGAATTCAGGGCTTC   | 3:5:6:19<br>GGACCACACTCACCTGCCACCAG  | 3'utr  | <i>Ube2v1</i>    | 0.3% |
|   |                 | Reverse | GGCCTTTCTCTAGGCATCTTT  |                                      |        |                  |      |
| 3 | chr6:-50334908  | Forward | GCTTCACCTAAGGGACTTGTAG | 4:08:18<br>TCCTGGTAGAATGAGCCTGATGG   | intron | <i>Osbp13</i>    | 1.1% |
|   |                 | Reverse | AGGTCTTACTGACTCCACATA  |                                      |        |                  |      |

|   |                 |         |                          |                                        |            |                |      |
|---|-----------------|---------|--------------------------|----------------------------------------|------------|----------------|------|
| 3 | chr2:+120960142 | Forward | GGCTGTCCTAGAACTCACTTTG   | 4:5:8:17<br>TCCTTGTGGAATGAGCTCGAGAG    | intergenic | <i>Lcmt2</i>   | 0.6% |
|   |                 | Reverse | GAGCGTCCTTAGGGAGATAGAT   |                                        |            |                |      |
| 3 | chr18:+16761798 | Forward | AGAGATGGTCTGAGCAAAGATAAG | 3:5:11:12<br>TCACAGTTGACAGAGCCCCGAGGG  | intron     | <i>Cdh2</i>    | ND   |
|   |                 | Reverse | CAGAGGGAGTAATGTTGGGATAAG |                                        |            |                |      |
| 3 | chr19:+15937358 | Forward | GAGGTCTGTGTGCAAAGGT      | 3:5:7:19<br>TCTCTGATGAATGAGCCCCACAG    | intergenic | <i>Psat1</i>   | 0.4% |
|   |                 | Reverse | GCTTCGGTTACTGCTGAGTT     |                                        |            |                |      |
| 3 | chr3:-60477413  | Forward | CACACTGATGCCCAGGATAAA    | 4:5:8:18<br>TCCAAGTGAATGAGCCAGAAAG     | intergenic | <i>Mbn1</i>    | ND   |
|   |                 | Reverse | ACAGAGAAGTTACATGCAGAGAAG |                                        |            |                |      |
| 3 | chr9:-57442270  | Forward | TTGATCTGCTCCTTCAGGTATTC  | 5:10:12:20<br>TCCCTGTTGTAGGAGCCCCGGCAG | intron     | <i>Ulk3</i>    | ND   |
|   |                 | Reverse | CTCAGGTCTGTGGGACATAAATAG |                                        |            |                |      |
| 3 | chr2:-148578529 | Forward | CATATAGTGGAGAGAAGCTCTTGG | 4:15:19<br>TCCTGGTTGAATGATCCCCATAG     | intron     | <i>Cst11</i>   | 0.0% |
|   |                 | Reverse | AGTGGTTGGCACAGTTCTAC     |                                        |            |                |      |
| 3 | chr2:-147438139 | Forward | TCAACAGAGCACAGCAGAC      | 4:7:8:18<br>TCCTGGAAGAATGAGCCAGACAG    | intergenic | <i>Pax1</i>    | ND   |
|   |                 | Reverse | TTATGACAGCTTGAACCCTACC   |                                        |            |                |      |
| 3 | chr13:-52994868 | Forward | CCGGTTTCTCAGTGTCTTT      | 3:8:10:14<br>TCTCGGTGGCATGTGCCCGAGAG   | intron     | <i>Auh</i>     | 1.2% |
|   |                 | Reverse | GGGTCATTTGCTCTGAGTT      |                                        |            |                |      |
| 3 | chr16:-10681231 | Forward | GGTGTGAAGACAGCGACTAT     | 4:5:13:19<br>TCCTTGTGTAATTAGCCCCAAGG   | intron     | <i>Clec16a</i> | 0.0% |
|   |                 | Reverse | GAGAGCAGTGGGTTGAGAAT     |                                        |            |                |      |

**Supplemental Table 4. Oligonucleotides used for RT-PCR, genotyping, gRNA, and repair template**

| Oligonucleotide                                                     |         | Sequence                 |
|---------------------------------------------------------------------|---------|--------------------------|
| Sequencing mutation in exon 2<br>Human <i>LMOD1</i>                 | Forward | GGAGGTGGCCAAGAAAGAGG     |
|                                                                     | Reverse | ATCATGAAGCCAGGGTCTCC     |
| qRT-PCR Human <i>LMOD1</i>                                          | Forward | GAGGCCATGCTCAACTTCTG     |
|                                                                     | Reverse | CTCTCCATTCTTGGCATCTG     |
| qRT-PCR Human <i>COPS5</i>                                          | Forward | CCAGGAACCATTTGTAGCAG     |
|                                                                     | Reverse | GTAGCCCTTTGGGTATGTCC     |
| qRT-PCR Human <i>CLK2</i>                                           | Forward | TCGTTAGCACCTTAGGAGAGG    |
|                                                                     | Reverse | TGATCTTCAGGGCAACTCG      |
| PCR genotyping primers for deletion<br>in exon 1 Mouse <i>Lmod1</i> | Forward | GCCCAAAGAGCTGCAGTGC      |
|                                                                     | Reverse | CTCACATCCACAGACATCTCTCTC |
| qRT-PCR Exon 1 Mouse <i>Lmod1</i>                                   | Forward | TGTGGATGAAAGCAAGCAAGTG   |

|                                                      |         |                                                                                                                                          |
|------------------------------------------------------|---------|------------------------------------------------------------------------------------------------------------------------------------------|
|                                                      | Reverse | AATACCTCTGATGACCTTCTCCTC                                                                                                                 |
| qRT-PCR Exon 2 Mouse <i>Lmod1</i>                    | Forward | CTGCCATCCGTTCTAGCAAC                                                                                                                     |
|                                                      | Reverse | CAAGAGTCTGGGCAGTCATG                                                                                                                     |
| qRT-PCR Mouse <i>Gusb</i>                            | Forward | CATCAGAAGCCGATTATCCAGAG                                                                                                                  |
|                                                      | Reverse | TGTTTCCGATTACTCTCAGCG                                                                                                                    |
| 2-component CRISPR gRNA1 (exon1)                     |         | CCAAAGTAGCTAAGTACCGG                                                                                                                     |
| 2-component CRISPR gRNA2 (exon 1)                    |         | GGTCTTCACTCACCTGCCGC                                                                                                                     |
| 2-component CRISPR gRNA3 (exon 1)                    |         | TCCCGTTGAATGAGCCCGA                                                                                                                      |
| 3-component CRISPR (CArG boxes)                      |         | AAACTGCTCTGTACTAAATT                                                                                                                     |
| ssoligo for 3-component CRISPR editing of CArG boxes |         | TCCTGCGGCTTCTGCCAGCCTTTGCATTTTTCTTTTTCTCAT<br>TGC GTGGCCCCCTTGTGGGTAAAAGGCTAAACTGCTCTGTAGG<br>GAATTTGGTCACGCAGCGCTCCAAGATTCCTGGAATGTCCTC |
